# Supplementary material for: Effective detection of Ag+, Hg2+ and dye adsorption properties studies of Ln-MOFs based on a benzimidazole carboxylic acid ligand
Source: Royal Society of Chemistry journal article supplement (doi:10.1039/d3dt00579h), 2023-01-01
Supplement: d3dt00579h1.pdf [file d3dt00579h1.pdf]

## Effective detection of Ag<sup>+</sup>, Hg<sup>2+</sup> and dye adsorption properties studies of Ln-MOFs based on benzimidazole carboxylic acid ligand

Qing-Wei Cao, Tian-Cai Yue, Qing-Wei Dong, Qi-Chao Ma, Ze-Bei Xie, Duo-Zhi Wang\* and  
Lu-Lu Wang\*

*State Key Laboratory of Chemistry and Utilization of Carbon Based Energy Resources;  
College of Chemistry, Xinjiang University, Urumqi, 830017, Xinjiang, P. R. China.*

### Supporting Information

**Table S1** Crystallographic data and structure refinement details for 1-5.

| Complexes                          | 1                                                                  | 2                                                                  | 3                                                                  | 4                                                                  | 5                                                                  |
|------------------------------------|--------------------------------------------------------------------|--------------------------------------------------------------------|--------------------------------------------------------------------|--------------------------------------------------------------------|--------------------------------------------------------------------|
| Empirical formula                  | C <sub>30</sub> H <sub>18</sub> ClN <sub>4</sub> O <sub>8</sub> Pr | C <sub>30</sub> H <sub>18</sub> ClN <sub>4</sub> O <sub>8</sub> Nd | C <sub>30</sub> H <sub>18</sub> ClN <sub>4</sub> O <sub>8</sub> Eu | C <sub>30</sub> H <sub>18</sub> ClN <sub>4</sub> O <sub>8</sub> Ho | C <sub>30</sub> H <sub>18</sub> ClN <sub>4</sub> O <sub>8</sub> Ce |
| Formula weight                     | 1493.69                                                            | 742.17                                                             | 765.89                                                             | 762.86                                                             | 738.05                                                             |
| Crystal system                     | Monoclinic                                                         | Monoclinic                                                         | Monoclinic                                                         | Monoclinic                                                         | Monoclinic                                                         |
| Space group                        | <i>C2/c</i>                                                        | <i>C2/c</i>                                                        | <i>C2/c</i>                                                        | <i>C2/c</i>                                                        | <i>C2/c</i>                                                        |
| Temperature/K                      | 296(2)                                                             | 296(2)                                                             | 296(2)                                                             | 296(2)                                                             | 296(2)                                                             |
| <i>a</i> /Å                        | 32.89(4)                                                           | 33.038                                                             | 33.009(4)                                                          | 32.8110(18)                                                        | 33.07(16)                                                          |
| <i>b</i> /Å                        | 5.0867(6)                                                          | 5.150                                                              | 5.1593(7)                                                          | 5.0340(3)                                                          | 5.1931(3)                                                          |
| <i>c</i> /Å                        | 16.067(2)                                                          | 16.005                                                             | 15.9530(19)                                                        | 16.1817(9)                                                         | 15.894(8)                                                          |
| <i>a</i> /deg                      | 90                                                                 | 90                                                                 | 90                                                                 | 90                                                                 | 90                                                                 |
| <i>b</i> /deg                      | 90.82(4)                                                           | 91.17                                                              | 91.315(3)                                                          | 90.401(2)                                                          | 91.435(1)                                                          |
| <i>g</i> /deg                      | 90                                                                 | 90                                                                 | 90                                                                 | 90                                                                 | 90                                                                 |
| V/Å <sup>3</sup>                   | 2688.1(6)                                                          | 2722.7                                                             | 2716.1(6)                                                          | 2670.8(3)                                                          | 2729.2(2)                                                          |
| Z                                  | 2                                                                  | 4                                                                  | 4                                                                  | 4                                                                  | 4                                                                  |
| ρ <sub>calc</sub> /cm <sup>3</sup> | 1.845                                                              | 1.811                                                              | 1.873                                                              | 1.897                                                              | 1.796                                                              |
| μ/mm <sup>-1</sup>                 | 1.977                                                              | 2.067                                                              | 2.475                                                              | 3.126                                                              | 1.828                                                              |
| F(000)                             | 1480                                                               | 1468                                                               | 1512                                                               | 1469                                                               | 1460                                                               |

|                             |               |                |               |               |               |
|-----------------------------|---------------|----------------|---------------|---------------|---------------|
| Reflections collected       | 18950         | 4264           | 18236         | 54560         | 20189         |
| Independent                 | 2367          | 2389           | 2386          | 4104          | 2418          |
| $R^a/wR^b/[I > 2\sigma(I)]$ | 0.0576/0.1424 | 0.0848/0.20995 | 0.0632/0.1743 | 0.0518/0.1244 | 0.0369/0.1038 |

$$R^a = \Sigma(|F_o| - |F_c|) / \Sigma|F_o|, wR^b = [\Sigma w(|F_o|^2 - |F_c|^2)^2 / \Sigma w(F_o^{2\sigma})]^{1/2}$$

**Table S2** Selected bond lengths [Å] and angles [°] for 1-5

| Ln-MOF 1            |           |                     |           |
|---------------------|-----------|---------------------|-----------|
| O(1)-Pr(1)          | 2.372(8)  | O(5)#2-Pr(1)-O(1)   | 75.6(2)   |
| O(1)-Pr(1)#4        | 2.595(8)  | O(3)#2-Pr(1)-O(1)   | 83.0(3)   |
| O(2)-Pr(1)          | 2.372(8)  | O(4)#5-Pr(1)-O(1)   | 132.0(3)  |
| O(2)-Pr(1)#4        | 2.584(8)  | O(2)-Pr(1)-O(1)     | 54.8(2)   |
| O(3)-Pr(1)#2        | 2.309(8)  | O(4)#7-Pr(1)-O(1)   | 78.1(3)   |
| O(3)-Pr(1)#3        | 2.348(8)  | O(5)#2-Pr(1)-O(3)#8 | 45.19(18) |
| O(4)-Pr(1)#5        | 2.385(8)  | O(3)#2-Pr(1)-O(3)#8 | 91.1(3)   |
| O(4)-Pr(1)#6        | 2.322(8)  | O(4)#5-Pr(1)-O(3)#8 | 149.5(3)  |
| Pr(1)-O(5)#2        | 1.91(2)   | O(2)-Pr(1)-O(3)#8   | 132.2(3)  |
| Pr(1)-O(3)#2        | 2.309(8)  | O(4)#7-Pr(1)-O(3)#8 | 87.9(3)   |
| Pr(1)-O(4)#5        | 2.385(8)  | O(1)-Pr(1)-O(3)#8   | 77.8(3)   |
| Pr(1)-O(4)#7        | 2.322(8)  | O(5)#2-Pr(1)-O(1)#4 | 70.16(19) |
| Pr(1)-O(3)#8        | 2.348(8)  | O(3)#2-Pr(1)-O(1)#4 | 74.1(2)   |
| Pr(1)-O(1)#4        | 2.594(8)  | O(4)#5-Pr(1)-O(1)#4 | 72.7(3)   |
| Pr(1)-O(2)#4        | 2.584(8)  | O(2)-Pr(1)-O(1)#4   | 146.8(4)  |
| O(3)#1-O(5)-Pr(1)#2 | 81.2(7)   | O(4)#7-Pr(1)-O(1)#4 | 124.2(3)  |
| O(3)-O(5)-Pr(1)#2   | 79.5(7)   | O(1)-Pr(1)-O(1)#4   | 145.7(3)  |
| O(3)#1-O(5)-Pr(1)#3 | 79.5(7)   | O(3)#8-Pr(1)-O(1)#4 | 77.5(2)   |
| O(3)-O(5)-Pr(1)#3   | 81.2(7)   | O(5)#2-Pr(1)-O(2)#4 | 108.4(3)  |
| O(5)-O(3)-Pr(1)#2   | 54.6(7)   | O(3)#2-Pr(1)-O(2)#4 | 123.6(3)  |
| O(5)-O(3)-Pr(1)#3   | 53.6(7)   | O(4)#5-Pr(1)-O(2)#4 | 72.6(2)   |
| O(5)#2-Pr(1)-O(3)#2 | 45.89(18) | O(2)-Pr(1)-O(2)#4   | 134.1(3)  |
| O(5)#2-Pr(1)-O(4)#5 | 126.2(3)  | O(4)#7-Pr(1)-O(2)#4 | 75.3(3)   |
| O(3)#2-Pr(1)-O(4)#5 | 87.3(3)   | O(1)-Pr(1)-O(2)#4   | 147.7(4)  |
| O(5)#2-Pr(1)-O(2)   | 117.4(3)  | O(3)#8-Pr(1)-O(2)#4 | 83.2(3)   |
| O(3)#2-Pr(1)-O(2)   | 88.9(3)   | O(1)#4-Pr(1)-O(2)#4 | 49.8(2)   |
| O(4)#5-Pr(1)-O(2)   | 78.3(3)   | O(3)#2-Pr(1)-O(4)#7 | 160.8(3)  |
| O(5)#2-Pr(1)-O(4)#7 | 129.8(4)  | O(4)#5-Pr(1)-O(4)#7 | 103.1(3)  |
| O(2)-Pr(1)-O(4)#7   | 77.7(3)   |                     |           |

**Ln-MOF 2**

|                     |           |                     |          |
|---------------------|-----------|---------------------|----------|
| Nd(1)-O(4)          | 2.385(8)  | O(4)#2-Nd(1)-O(2)#1 | 127.0(3) |
| Nd(1)-O(4)#2        | 2.385(8)  | O(3)#3-Nd(1)-O(2)#1 | 77.6(3)  |
| Nd(1)-O(3)#3        | 2.400(8)  | O(3)#4-Nd(1)-O(2)#1 | 74.2(3)  |
| Nd(1)-O(3)#4        | 2.400(8)  | O(4)-Nd(1)-O(2)#5   | 127.0(3) |
| Nd(1)-O(2)#1        | 2.526(8)  | O(4)#2-Nd(1)-O(2)#5 | 87.7(3)  |
| Nd(1)-O(2)#5        | 2.526(8)  | O(3)#3-Nd(1)-O(2)#5 | 74.2(3)  |
| Nd(1)-O(1)#5        | 2.530(7)  | O(3)#4-Nd(1)-O(2)#5 | 77.6(3)  |
| Nd(1)-O(1)#1        | 2.530(7)  | O(2)#1-Nd(1)-O(2)#5 | 133.4(4) |
| Nd(1)-C(1)#1        | 2.878(12) | O(4)-Nd(1)-O(1)#5   | 75.9(3)  |
| Nd(1)-C(1)#5        | 2.878(12) | O(4)#2-Nd(1)-O(1)#5 | 80.8(3)  |
| O(1)-Nd(1)#1        | 2.530(7)  | O(3)#3-Nd(1)-O(1)#5 | 74.7(3)  |
| O(2)-Nd(1)#1        | 2.526(8)  | O(3)#4-Nd(1)-O(1)#5 | 127.9(3) |
| O(3)-Nd(1)#6        | 2.400(8)  | O(2)#1-Nd(1)-O(1)#5 | 148.1(3) |
| O(4)-Nd(1)-O(4)#2   | 89.6(4)   | O(2)#5-Nd(1)-O(1)#5 | 51.4(3)  |
| O(4)-Nd(1)-O(3)#3   | 88.1(3)   | O(4)-Nd(1)-O(1)#1   | 80.8(3)  |
| O(4)#2-Nd(1)-O(3)#3 | 155.2(3)  | O(4)#2-Nd(1)-O(1)#1 | 75.9(3)  |
| O(4)-Nd(1)-O(3)#4   | 155.2(3)  | O(3)#3-Nd(1)-O(1)#1 | 127.9(3) |
| O(4)#2-Nd(1)-O(3)#4 | 88.1(3)   | O(3)#4-Nd(1)-O(1)#1 | 74.7(3)  |
| O(3)#3-Nd(1)-O(3)#4 | 104.0(4)  | O(2)#1-Nd(1)-O(1)#1 | 51.4(3)  |
| O(4)-Nd(1)-O(2)#1   | 87.7(3)   | O(2)#5-Nd(1)-O(1)#1 | 148.1(3) |
| O(1)#5-Nd(1)-O(1)#1 | 146.9(4)  |                     |          |

### Ln-MOF 3

|                   |            |                     |            |
|-------------------|------------|---------------------|------------|
| Eu(1)-O(2)        | 2.383(6)   | O(2)#1-Eu(1)-O(3)#2 | 126.7(2)   |
| Eu(1)-O(2)#1      | 2.383(6)   | O(1)#3-Eu(1)-O(3)#2 | 77.1(2)    |
| Eu(1)-O(1)#3      | 2.422(6)   | O(1)#4-Eu(1)-O(3)#2 | 74.7(2)    |
| Eu(1)-O(1)#4      | 2.422(6)   | O(5)-Eu(1)-O(3)#5   | 113.26(18) |
| Eu(1)-O(3)#2      | 2.528(7)   | O(2)-Eu(1)-O(3)#5   | 126.7(2)   |
| Eu(1)-O(3)#5      | 2.528(7)   | O(2)#1-Eu(1)-O(3)#5 | 87.8(2)    |
| Eu(1)-O(4)#5      | 2.540(7)   | O(1)#3-Eu(1)-O(3)#5 | 74.7(2)    |
| Eu(1)-O(4)#2      | 2.540(7)   | O(1)#4-Eu(1)-O(3)#5 | 77.1(2)    |
| O(1)-Eu(1)#6      | 2.422(6)   | O(3)#2-Eu(1)-O(3)#5 | 133.5(4)   |
| O(3)-Eu(1)#2      | 2.528(7)   | O(5)-Eu(1)-O(4)#5   | 73.17(16)  |
| O(4)-Eu(1)#2      | 2.540(7)   | O(2)-Eu(1)-O(4)#5   | 75.7(2)    |
| O(2)#1-O(5)-Eu(1) | 83.2(4)    | O(2)#1-Eu(1)-O(4)#5 | 80.6(2)    |
| O(5)-Eu(1)-O(2)   | 44.95(16)  | O(1)#3-Eu(1)-O(4)#5 | 75.6(2)    |
| O(5)-Eu(1)-O(2)#1 | 44.95(16)  | O(1)#4-Eu(1)-O(4)#5 | 127.3(2)   |
| O(2)-Eu(1)-O(2)#1 | 89.9(3)    | O(3)#2-Eu(1)-O(4)#5 | 148.5(2)   |
| O(5)-Eu(1)-O(1)#3 | 128.02(17) | O(3)#5-Eu(1)-O(4)#5 | 51.4(2)    |

|                     |            |                     |           |
|---------------------|------------|---------------------|-----------|
| O(2)-Eu(1)-O(1)#3   | 87.6(2)    | O(5)-Eu(1)-O(4)#2   | 73.17(16) |
| O(2)#1-Eu(1)-O(1)#3 | 155.9(2)   | O(2)-Eu(1)-O(4)#2   | 80.6(2)   |
| O(5)-Eu(1)-O(1)#4   | 128.02(17) | O(2)#1-Eu(1)-O(4)#2 | 75.7(2)   |
| O(2)-Eu(1)-O(1)#4   | 155.9(2)   | O(1)#3-Eu(1)-O(4)#2 | 127.3(2)  |
| O(2)#1-Eu(1)-O(1)#4 | 87.6(2)    | O(1)#4-Eu(1)-O(4)#2 | 75.6(2)   |
| O(1)#3-Eu(1)-O(1)#4 | 104.0(3)   | O(3)#2-Eu(1)-O(4)#2 | 51.4(2)   |
| O(5)-Eu(1)-O(3)#2   | 113.26(18) | O(3)#5-Eu(1)-O(4)#2 | 148.5(2)  |
| O(2)-Eu(1)-O(3)#2   | 87.8(2)    | O(4)#5-Eu(1)-O(4)#2 | 146.3(3)  |

#### Ln-MOF 4

|                     |            |                     |            |
|---------------------|------------|---------------------|------------|
| Ho(1)-O(2)#2        | 2.283(4)   | O(1)#4-Ho(1)-O(4)#1 | 128.87(14) |
| Ho(1)-O(2)          | 2.283(4)   | O(2)#2-Ho(1)-O(4)#5 | 80.17(14)  |
| Ho(1)-O(1)#3        | 2.306(4)   | O(2)-Ho(1)-O(4)#5   | 75.92(14)  |
| Ho(1)-O(1)#4        | 2.306(4)   | O(1)#3-Ho(1)-O(4)#5 | 128.87(14) |
| Ho(1)-O(4)#1        | 2.435(4)   | O(1)#4-Ho(1)-O(4)#5 | 75.14(14)  |
| Ho(1)-O(4)#5        | 2.435(4)   | O(4)#1-Ho(1)-O(4)#5 | 145.5(2)   |
| Ho(1)-O(3)#5        | 2.447(4)   | O(2)#2-Ho(1)-O(3)#5 | 85.14(15)  |
| Ho(1)-O(3)#1        | 2.447(4)   | O(2)-Ho(1)-O(3)#5   | 128.53(13) |
| O(1)-Ho(1)#6        | 2.306(4)   | O(1)#3-Ho(1)-O(3)#5 | 76.76(14)  |
| O(3)-Ho(1)#1        | 2.447(4)   | O(1)#4-Ho(1)-O(3)#5 | 75.34(15)  |
| O(4)-Ho(1)#1        | 2.435(4)   | O(4)#1-Ho(1)-O(3)#5 | 146.33(14) |
| O(2)#2-Ho(1)-O(2)   | 91.39(19)  | O(4)#5-Ho(1)-O(3)#5 | 52.85(13)  |
| O(2)#2-Ho(1)-O(1)#3 | 88.33(15)  | O(2)#2-Ho(1)-O(3)#1 | 128.53(13) |
| O(2)-Ho(1)-O(1)#3   | 154.60(14) | O(2)-Ho(1)-O(3)#1   | 85.14(15)  |
| O(2)#2-Ho(1)-O(1)#4 | 154.61(14) | O(1)#3-Ho(1)-O(3)#1 | 75.34(15)  |
| O(2)-Ho(1)-O(1)#4   | 88.33(15)  | O(1)#4-Ho(1)-O(3)#1 | 76.76(14)  |
| O(1)#3-Ho(1)-O(1)#4 | 102.5(2)   | O(4)#1-Ho(1)-O(3)#1 | 52.85(13)  |
| O(2)#2-Ho(1)-O(4)#1 | 75.91(14)  | O(4)#5-Ho(1)-O(3)#1 | 146.33(14) |
| O(2)-Ho(1)-O(4)#1   | 80.17(14)  | O(3)#5-Ho(1)-O(3)#1 | 134.7(2)   |
| O(1)#3-Ho(1)-O(4)#1 | 75.14(14)  |                     |            |

#### Ln-MOF 5

|              |          |                     |            |
|--------------|----------|---------------------|------------|
| Ce(1)-O(2)#2 | 2.405(3) | O(1)#4-Ce(1)-O(3)#5 | 74.53(14)  |
| Ce(1)-O(2)   | 2.405(3) | O(2)#2-Ce(1)-O(3)#1 | 126.30(12) |
| Ce(1)-O(1)#3 | 2.439(3) | O(2)-Ce(1)-O(3)#1   | 88.28(13)  |
| Ce(1)-O(1)#4 | 2.439(4) | O(1)#3-Ce(1)-O(3)#1 | 74.53(13)  |
| Ce(1)-O(3)#5 | 2.552(4) | O(1)#4-Ce(1)-O(3)#1 | 77.54(12)  |
| Ce(1)-O(3)#1 | 2.552(4) | O(3)#5-Ce(1)-O(3)#1 | 133.55(19) |
| Ce(1)-O(4)#1 | 2.556(4) | O(2)#2-Ce(1)-O(4)#1 | 76.11(12)  |
| Ce(1)-O(4)#5 | 2.556(4) | O(2)-Ce(1)-O(4)#1   | 81.08(12)  |

|                     |            |                     |            |
|---------------------|------------|---------------------|------------|
| O(1)-Ce(1)#6        | 2.439(3)   | O(1)#3-Ce(1)-O(4)#1 | 74.90(12)  |
| O(3)-Ce(1)#1        | 2.552(4)   | O(1)#4-Ce(1)-O(4)#1 | 126.85(12) |
| O(4)-Ce(1)#1        | 2.556(3)   | O(3)#5-Ce(1)-O(4)#1 | 148.69(12) |
| O(2)#2-Ce(1)-O(2)   | 89.11(17)  | O(3)#1-Ce(1)-O(4)#1 | 50.53(12)  |
| O(2)#2-Ce(1)-O(1)#3 | 87.68(13)  | O(2)#2-Ce(1)-O(4)#5 | 81.08(12)  |
| O(2)-Ce(1)-O(1)#3   | 155.84(12) | O(2)-Ce(1)-O(4)#5   | 76.11(12)  |
| O(2)#2-Ce(1)-O(1)#4 | 155.84(12) | O(1)#3-Ce(1)-O(4)#5 | 126.85(12) |
| O(2)-Ce(1)-O(1)#4   | 87.68(13)  | O(1)#4-Ce(1)-O(4)#5 | 74.90(12)  |
| O(1)#3-Ce(1)-O(1)#4 | 104.57(19) | O(3)#5-Ce(1)-O(4)#5 | 50.53(12)  |
| O(2)#2-Ce(1)-O(3)#5 | 88.28(13)  | O(3)#1-Ce(1)-O(4)#5 | 148.69(12) |
| O(2)-Ce(1)-O(3)#5   | 126.30(12) | O(4)#1-Ce(1)-O(4)#5 | 147.81(17) |
| O(1)#3-Ce(1)-O(3)#5 | 77.54(12)  |                     |            |

---

Symmetry codes, for 1: #1 -x+1,y,-z+3/2; #2 -x+1,-y,-z+1; #3 x,-y,z+1/2; #4 -x+1,y,-z+1/2; #5 -x+1,-y+1,-z+1; #6 x,-y+1,z+1/2; #7 x,-y+1,z-1/2; #8 x,-y,z-1/2; for 2: #1 -x+1,-y+2,-z+1; #2 -x+1,y,-z+1/2; #3 x,y+1,z; #4 -x+1,y+1,-z+1/2; #5 x,-y+2,z-1/2; #6 x,y-1,z; for 3: #1 -x+1,y,-z+1/2; #2 -x+1,-y+2,-z+1; #3 x,y+1,z; #4 -x+1,y+1,-z+1/2; #5 x,-y+2,z-1/2; #6 x,y-1,z; for 4: #1 -x+1,-y+2,-z+1; #2 -x+1,y,-z+3/2; #3 -x+1,y+1,-z+3/2; #4 x,y+1,z; #5 x,-y+2,z+1/2; #6 x,y-1,z; for 5: #1 -x+1,-y+2,-z+1; #2 -x+1,y,-z+3/2; #3 -x+1,y+1,-z+3/2; #4 x,y+1,z; #5 x,-y+2,z+1/2; #6 x,y-1,z.

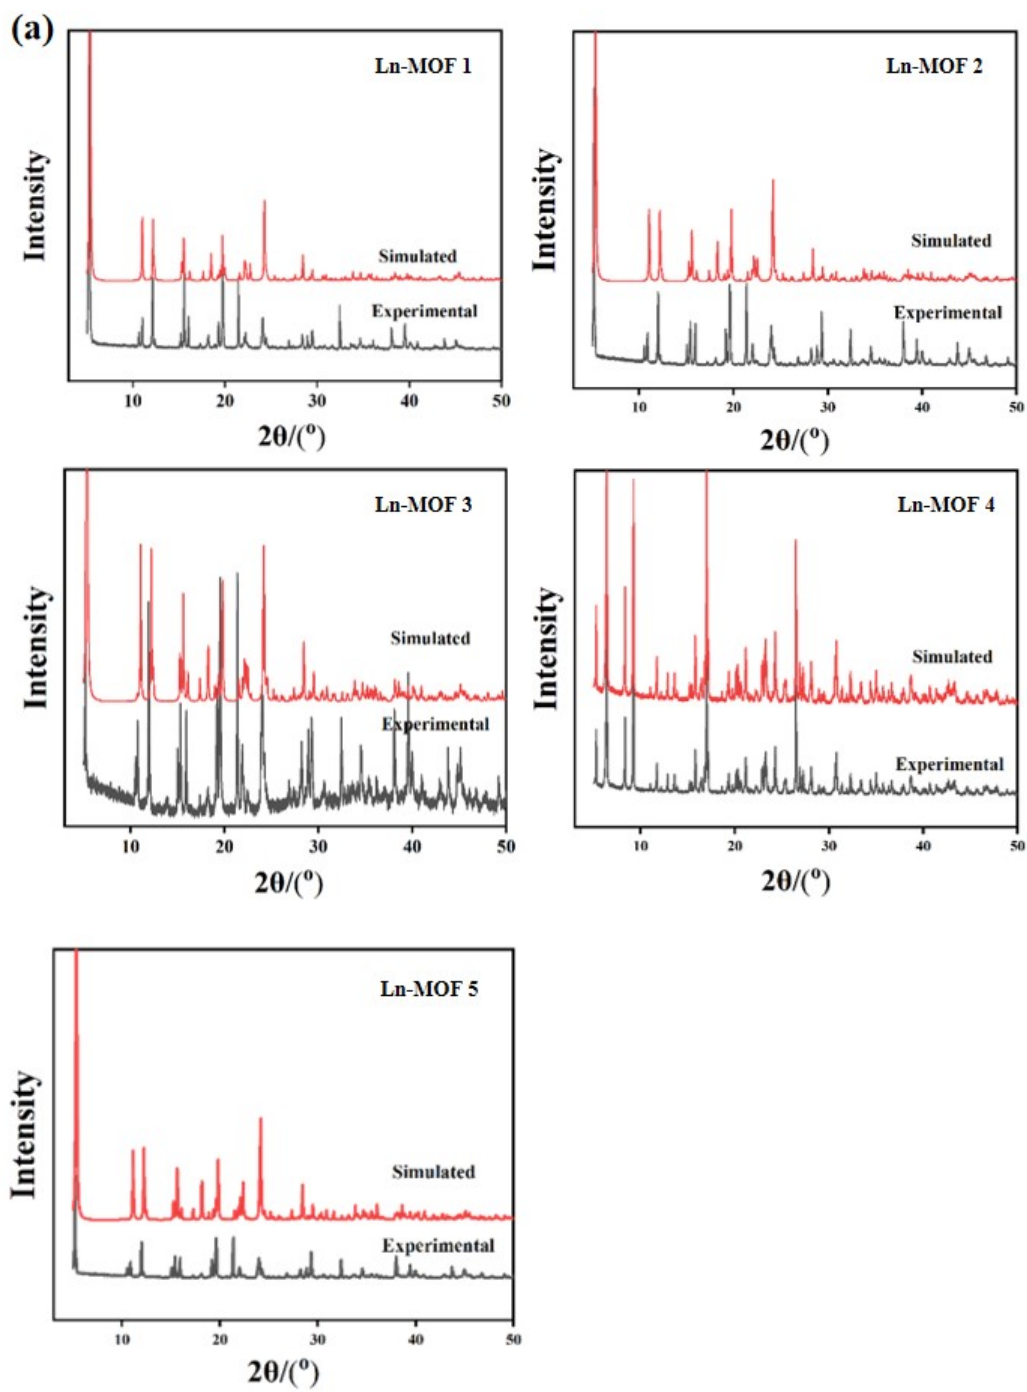

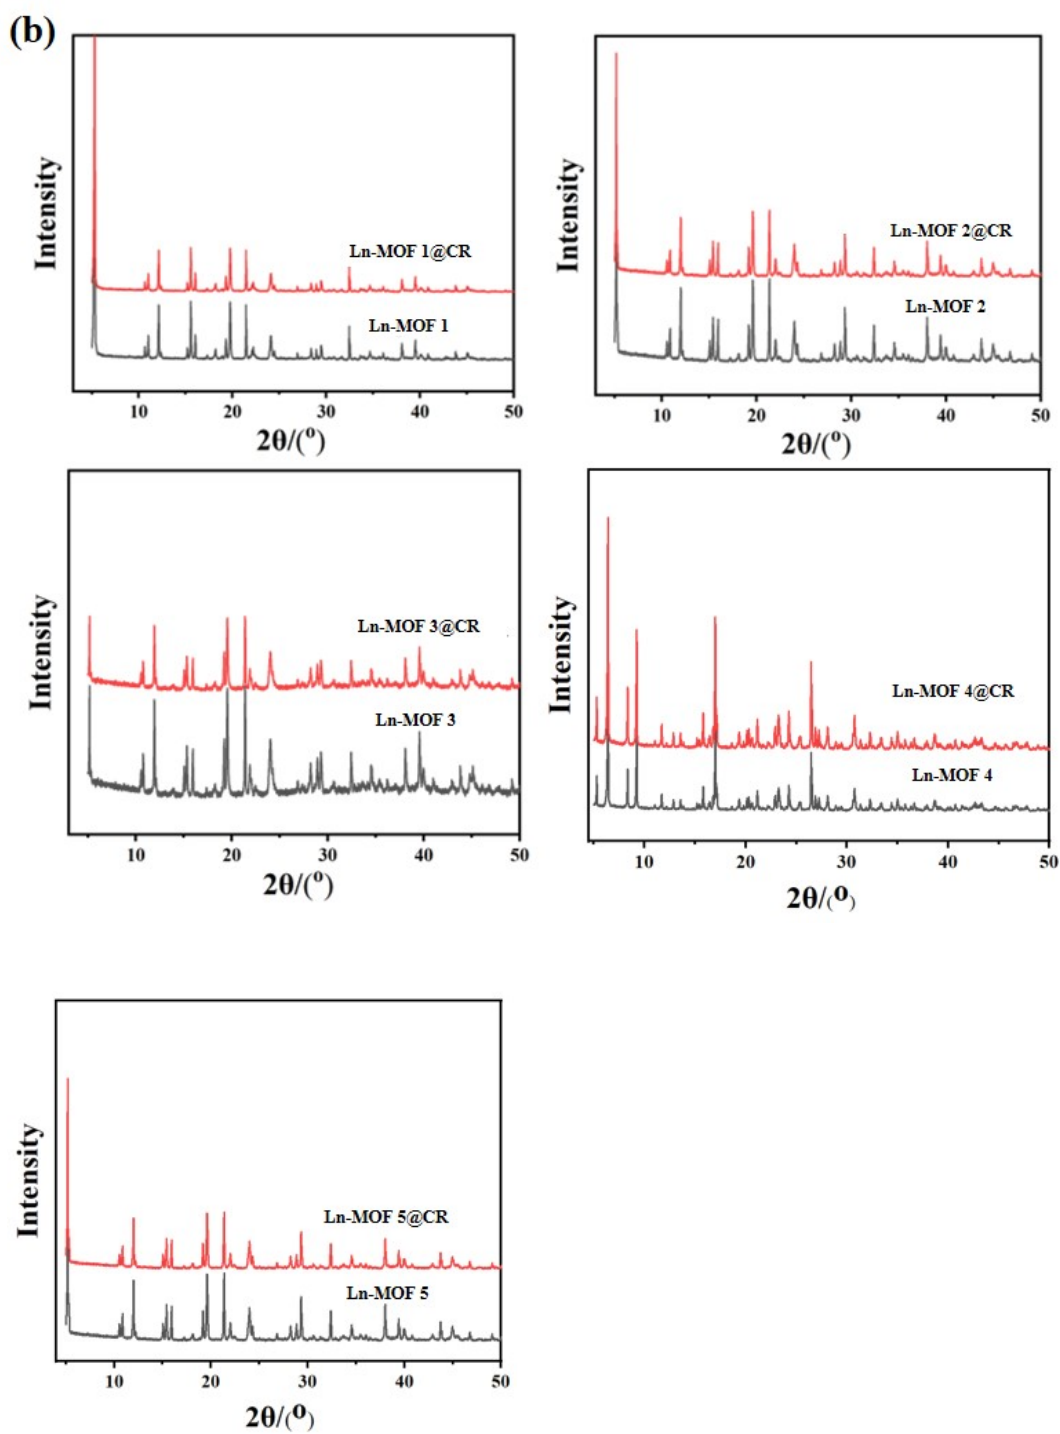

**Fig. S1:** (a) The experimental and simulated PXRD patterns of Ln-MOFs 1-5. (b) PXRD of Ln-MOFs 1-5 before and after dye adsorption.

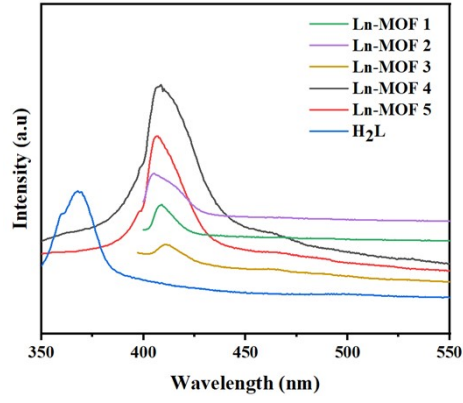

**Fig. S2:** Emission spectra of H<sub>2</sub>L ligand and Ln-MOFs 1-5 at room temperature ( $\lambda_{\text{ex}} = 360$  nm and 350 nm, respectively).

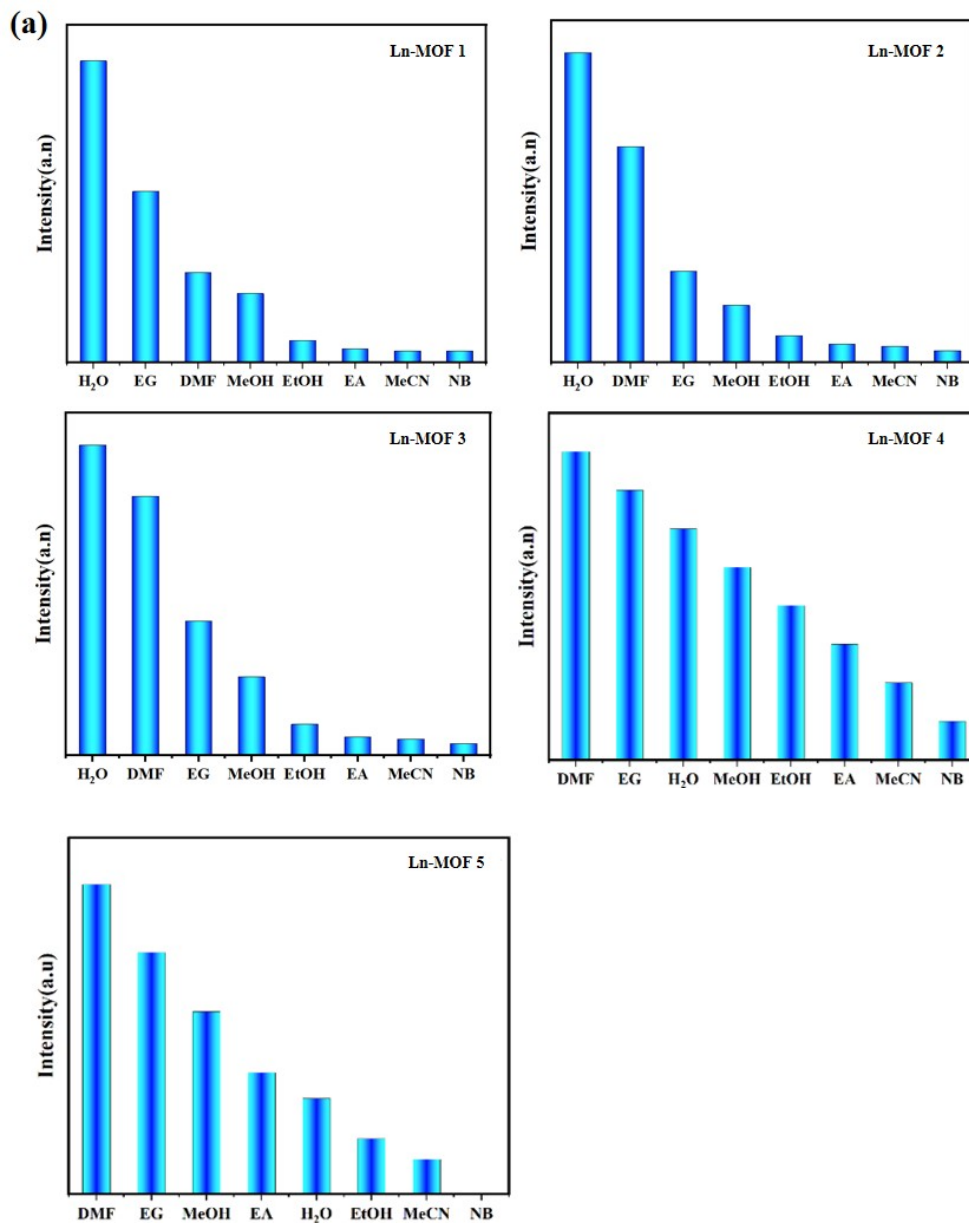



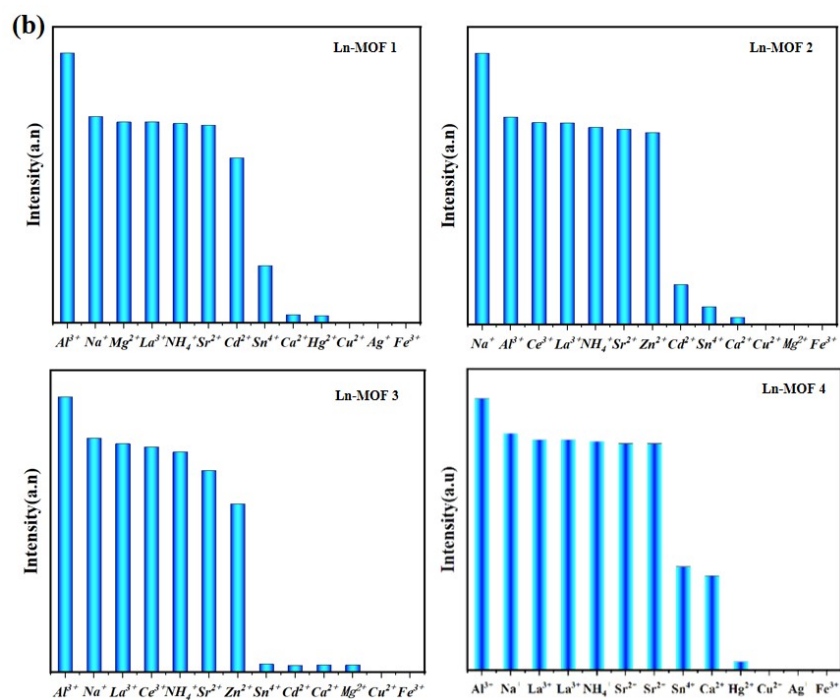

**Fig. S3:** (a) The fluorescence intensity of **1-5** in different solvents; (b) The fluorescence intensity of **1-4** in solutions containing various cations.

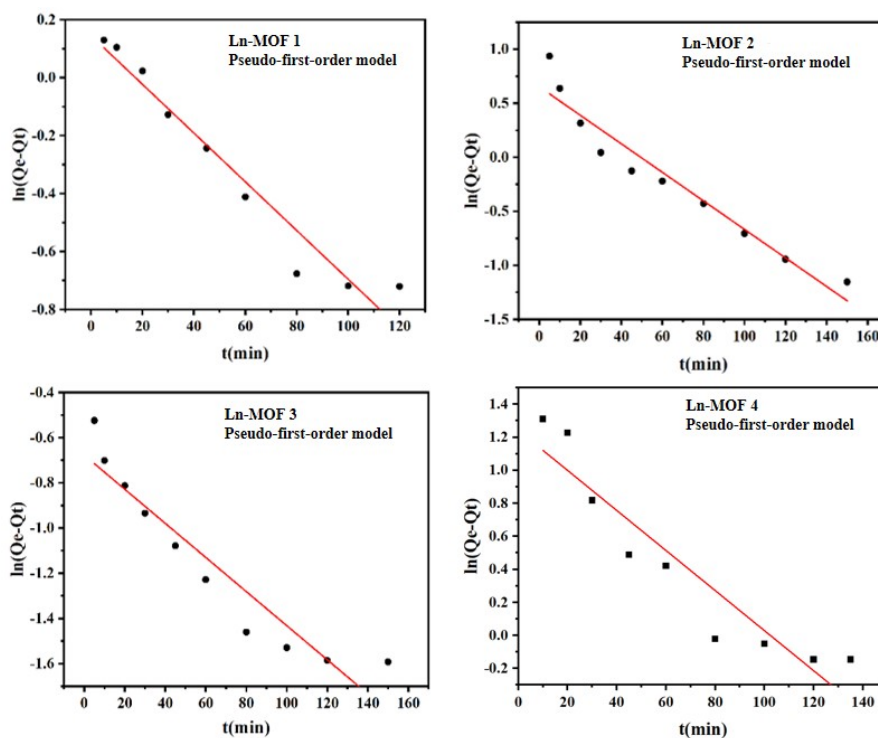

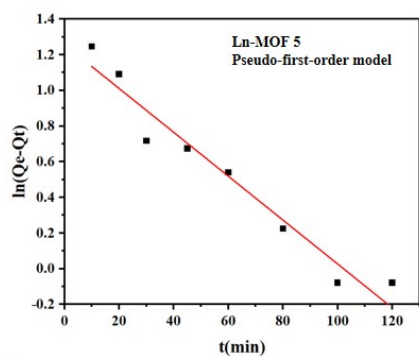

Fig. S4: Pseudo-first-order kinetic model for the adsorption of CR by Ln-MOFs 1-5.

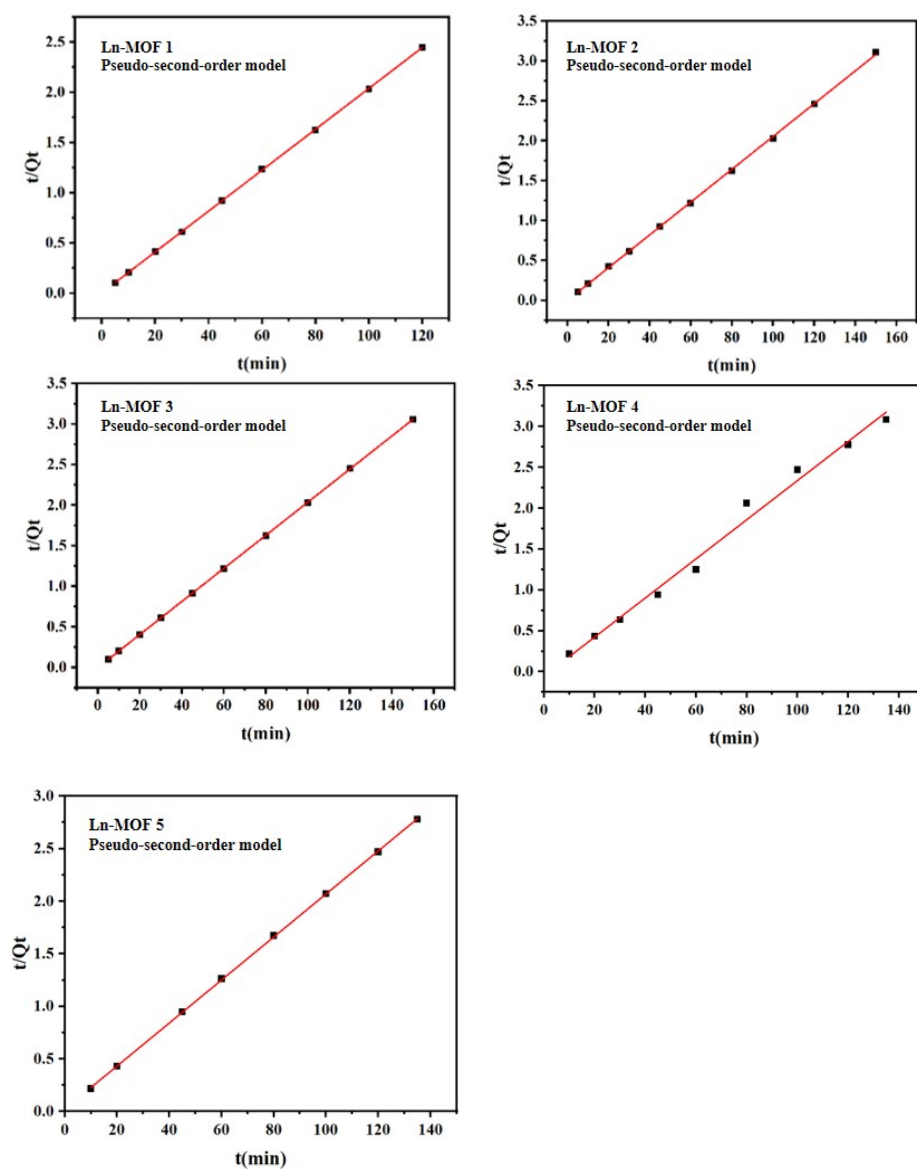

Fig. S5: Pseudo-second-order kinetic model for the adsorption of CR by Ln-MOFs 1-5.

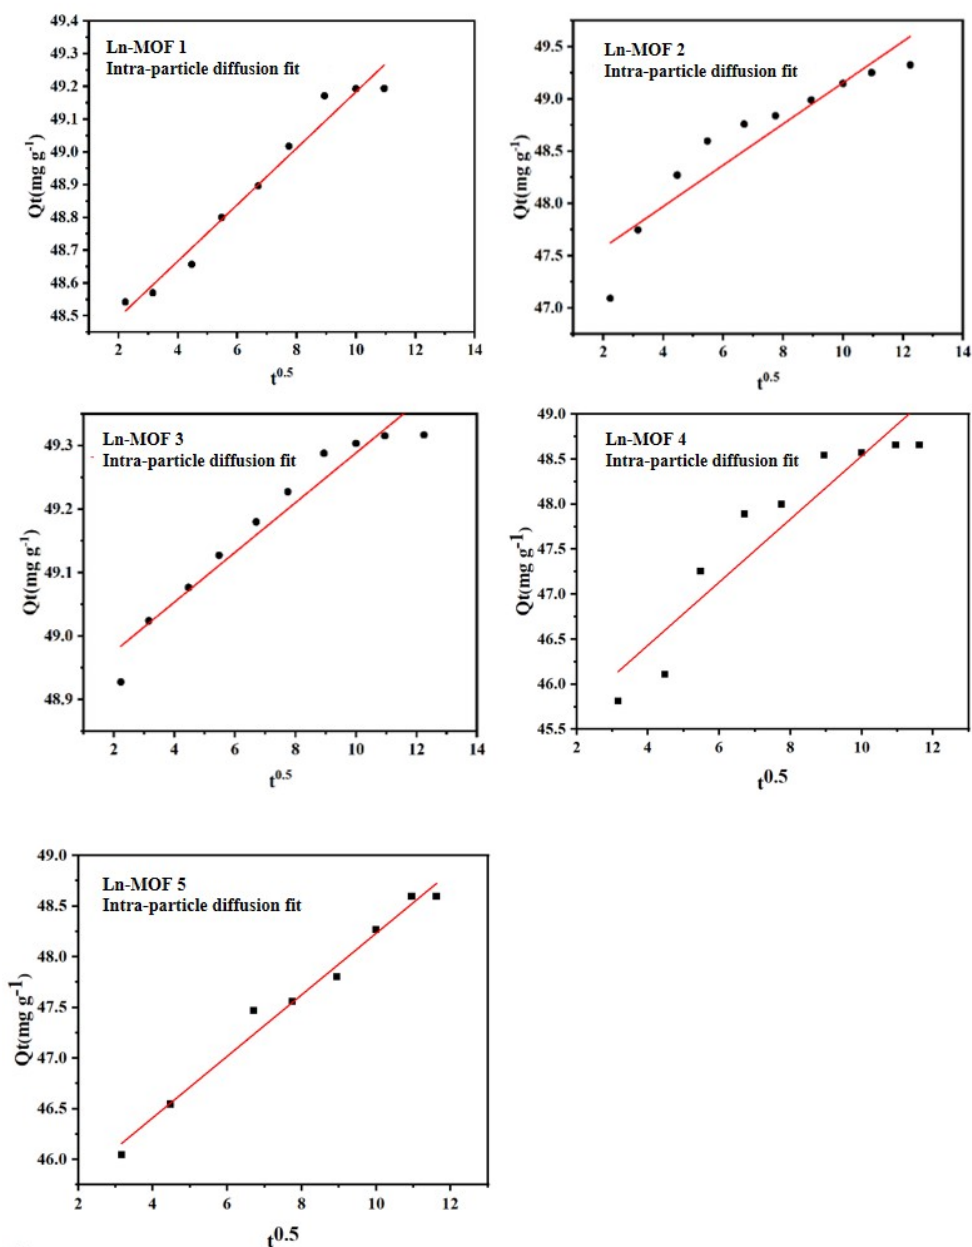

**Fig. S6:** Particle diffusion model for the adsorption of CR by Ln-MOFs 1-5.

**Table S3.** Kinetic parameters of adsorption of CR by Ln-MOFs 1-5

|   | The pseudo-first-order rate equation |                          |        | The pseudo-second-order rate equation |                          |        | Intra-particle diffusion equation |       |        |
|---|--------------------------------------|--------------------------|--------|---------------------------------------|--------------------------|--------|-----------------------------------|-------|--------|
|   | $\ln(Q_e - Q_t) = \ln Q_e - K_1 t$   |                          |        | $t/Q_t = 1/K_2 Q_e^2 + t/Q_e$         |                          |        | $Q_t = K_i t^{0.5} + C$           |       |        |
|   | $K_1 (\text{min}^{-1})$              | $Q_e (\text{mg g}^{-1})$ | $R^2$  | $K_2 (\text{min}^{-1})$               | $Q_e (\text{mg g}^{-1})$ | $R^2$  | $K_i$                             | $C$   | $R^2$  |
| 1 | 0.0084                               | 1.156                    | 0.9409 | 0.0961                                | 49.26                    | 0.9999 | 0.086                             | 48.32 | 0.9670 |
| 2 | 0.0132                               | 1.923                    | 0.9283 | 0.1547                                | 48.66                    | 0.9997 | 0.197                             | 47.18 | 0.8517 |
| 3 | 0.0075                               | 0.508                    | 0.8848 | 0.179                                 | 49.02                    | 0.9999 | 0.039                             | 48.89 | 0.9314 |
| 4 | 0.0121                               | 3.442                    | 0.8703 | 0.011                                 | 41.81                    | 0.9949 | 0.350                             | 45.03 | 0.8649 |
| 5 | 0.0123                               | 3.477                    | 0.9439 | 0.017                                 | 48.89                    | 0.9998 | 0.303                             | 45.19 | 0.9798 |

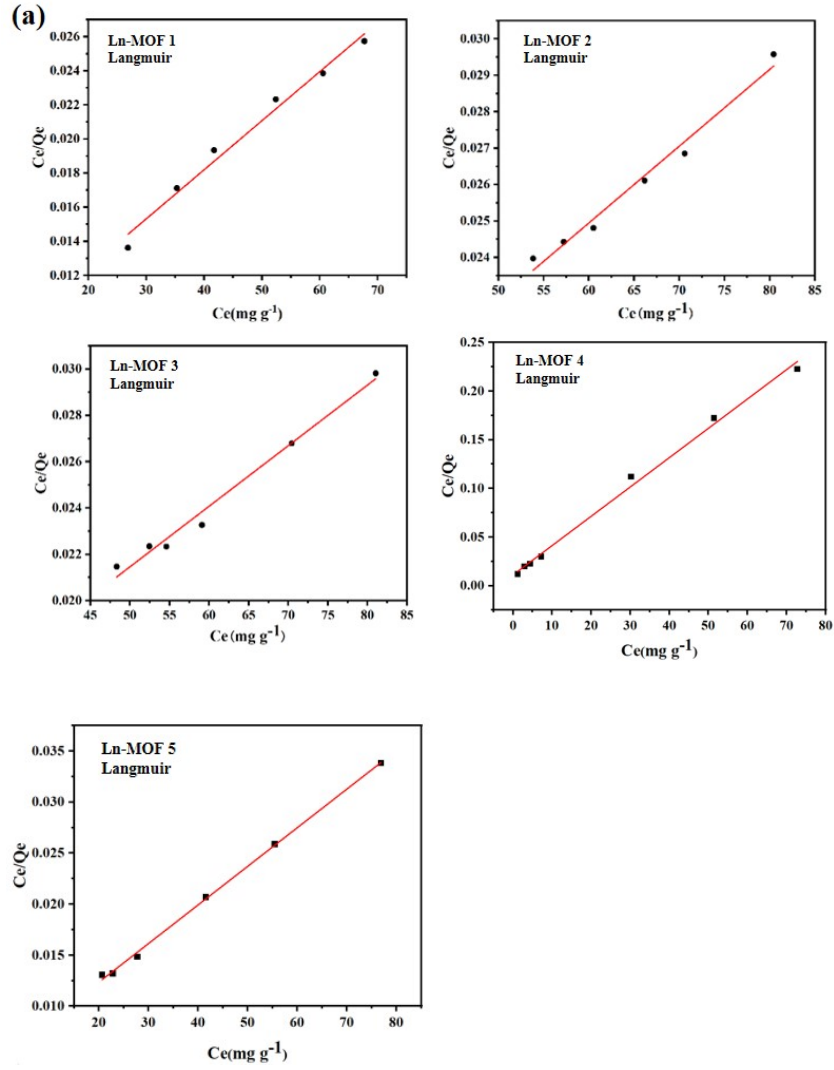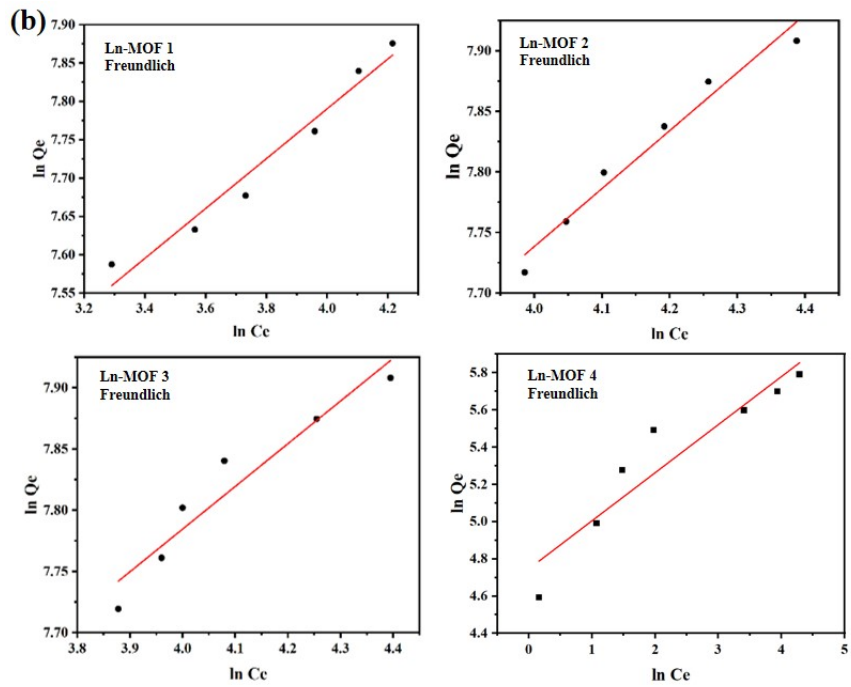

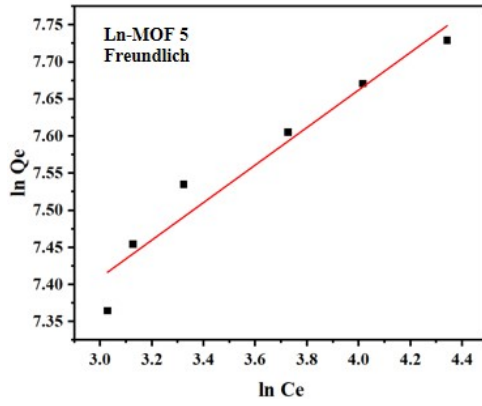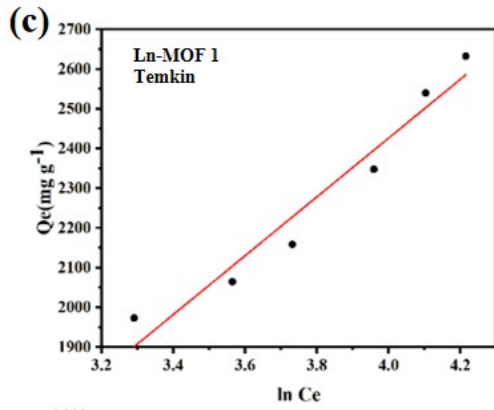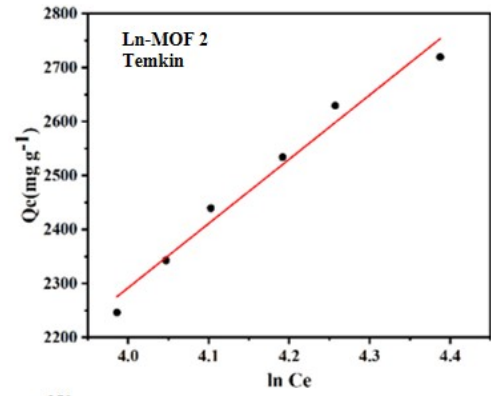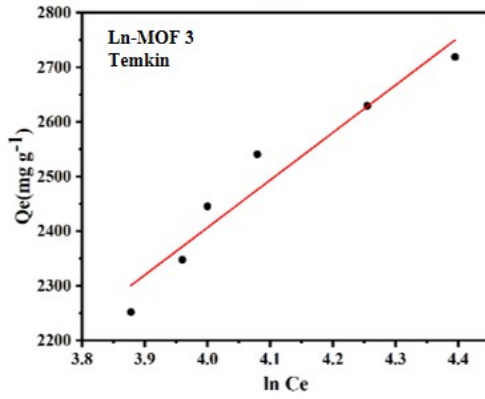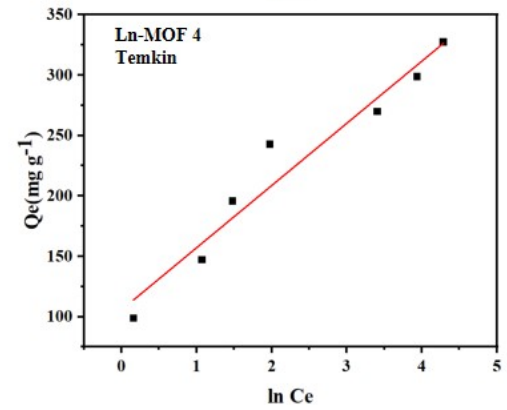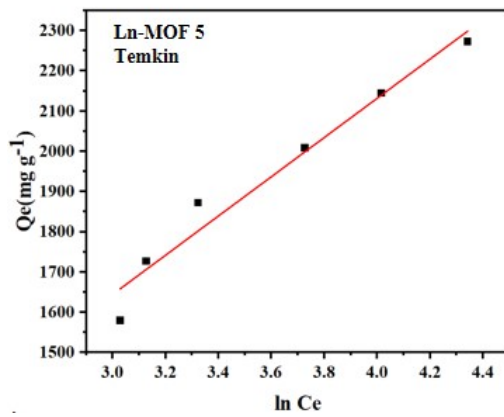

**Fig. S7:** (a) Fitting results of Langmuir model for CR adsorption by Ln-MOFs **1-5**; (b) Fitting results of Freundlich model for CR adsorption by Ln-MOFs **1-5**; (c) Fitting results of Temkin model for CR adsorption by Ln-MOFs **1-5**.  $\ln Q_e = B \ln K_T + B \ln C_e$

**Table S4.** Isotherm parameters of adsorption of CR by Ln-MOFs **1-5**

|   | Langmuir                        |                             |                | Freundlich                        |       |                | Temkin                        |      |                |
|---|---------------------------------|-----------------------------|----------------|-----------------------------------|-------|----------------|-------------------------------|------|----------------|
|   | $C_e/Q_e = C_e/Q_m + 1/Q_m K_L$ |                             |                | $\ln Q_e = B \ln K_T + B \ln C_e$ |       |                | $Q_e = \ln K_F + b_F \ln C_e$ |      |                |
|   | $K_L$ (L mg <sup>-1</sup> )     | $Q_m$ (mg g <sup>-1</sup> ) | R <sup>2</sup> | $K_F$ (mg g <sup>-1</sup> )       | $b_F$ | R <sup>2</sup> | $K_T$                         | B    | R <sup>2</sup> |
| 1 | 0.00029                         | 3448                        | 0.9832         | 657                               | 0.32  | 0.9545         | 0.4857                        | 740  | 0.9381         |
| 2 | 0.00028                         | 3571                        | 0.9814         | 336                               | 0.47  | 0.9597         | 0.1255                        | 1190 | 0.9698         |
| 3 | 0.00027                         | 3703                        | 0.9858         | 595                               | 0.35  | 0.9053         | 0.2922                        | 869  | 0.9209         |
| 4 | 0.00301                         | 332                         | 0.9939         | 115                               | 0.25  | 0.8643         | 7.7194                        | 51   | 0.9391         |
| 5 | 0.00038                         | 2645                        | 0.9984         | 757                               | 0.25  | 0.9285         | 1.4514                        | 487  | 0.9543         |
